# Supplementary material for: Uncertainties in the effects of organic aerosol coatings on polycyclic aromatic hydrocarbon concentrations and their estimated health effects
Source: Copernicus journal article supplement (doi:10.5194/egusphere-2024-3269), 2024-11-04
Supplement: Supplementary file 1 [file egusphere-2024-3269-supplement.pdf]

*Supplement of*

***Uncertainties in the effects of organic aerosol coatings on polycyclic aromatic hydrocarbon concentrations and their estimated health effects***

Sijia Lou<sup>1,2</sup>, Manish Shrivastava<sup>3</sup>, Alexandre Albinet<sup>4</sup>, Sophie Tomaz<sup>4,5</sup>, Deepchandra Srivastava<sup>4,6</sup>, Olivier Favez<sup>4</sup>, Huizhong Shen<sup>7</sup>, Aijun Ding<sup>1,2</sup>

**Sijia Lou<sup>1,2</sup>, Manish Shrivastava<sup>3</sup>, Alexandre Albinet<sup>4</sup>, Sophie Tomaz<sup>4,5</sup>,  
Deepchandra Srivastava<sup>4,6</sup>, Olivier Favez<sup>4</sup>, Huizhong Shen<sup>7</sup>, Aijun Ding<sup>1,2</sup>**

<sup>1</sup>Joint International Research Laboratory of Atmospheric and Earth System Sciences, School of Atmospheric Sciences, Jiangsu Provincial Collaborative Innovation Center of Climate Change, Nanjing University, Nanjing, 210023, China

<sup>2</sup>Frontiers Science Center for Critical Earth Material Cycling, Nanjing University, Nanjing 210023, China

<sup>3</sup>Pacific Northwest National Laboratory, Richland, WA 99354, USA

<sup>4</sup>Institut National de l'Environnement industriel et des RISques (Ineris), 60550, Verneuil en Halatte, France

<sup>5</sup>now at : INRS, 1 rue du Morvan CS 60027, 54519, Vandoeuvre-lès-Nancy, France

<sup>6</sup>now at: School of Geography Earth and Environmental Science, University of Birmingham, Edgbaston, Birmingham, UK B15 2TT

<sup>7</sup>Shenzhen Key Laboratory of Precision Measurement and Early Warning Technology for Urban Environmental Health Risks, School of Environmental Science and Engineering, Southern University of Science and Technology, Shenzhen 518055, China

Correspondence to: Sijia Lou ([lousijia@nju.edu.com](mailto:lousijia@nju.edu.com)); Manish Shrivastava (ManishKumar.Shrivastava@pnnl.gov)

Table S1: 66 background sites information [IADN; Hung et al., 2010; Tørseth et al., 2012; Shen et al., 2014; Boruvkova, 2015]

| region        | lat  | lon              | Location name                         | Obs. period                  |
|---------------|------|------------------|---------------------------------------|------------------------------|
| North America | 47.5 | -88.1            | Eagle Harbor, MI                      | 2005–2010                    |
|               | 43.8 | -77.2            | Point Petre, ON                       | 2005–2010                    |
|               | 44.8 | -86.1            | Sleeping bear dunes, MI               | 2005–2010                    |
|               | 42.7 | -79.1            | Sturgeon point, NY                    | 2005–2010                    |
|               | 45.8 | -82.9            | Burnt Island, ON                      | 2005–2010                    |
|               | 33.9 | -85.0            | Yorkville, GA                         | 2002, May                    |
|               | 39.2 | -76.2            | Chesapeake Bay, America               | 1997, summer<br>1997, winter |
|               | 44.0 | -121.7           | Mount Bachelor Observatory            | 2004–2006, spring            |
|               | 40.6 | 22.9             | Greater Athens Area, Greece           | 2001, May–2002, June         |
|               | 42.0 | 13.3             | Central Italy park, Italy             | 2000–2001                    |
| Europe        | 43.3 | 5.5              | Marseille, France, Plan d’Aups, rural | 2004, July                   |
|               | 50.9 | 5.4              | Hasselt, Flanders, Belgium            | 2002, spring<br>2002, winter |
|               | 58.8 | 17.4             | Aspvreten, Sweden                     | 2005–2011                    |
|               | 58.4 | 8.3              | Birkenes, Norway                      | 2008–2009                    |
|               | 59.5 | 25.9             | Lahemaa, Estonia                      | 2007–2009                    |
|               | 47.9 | 7.9              | Schauinsland, Germany                 | 2007–2010                    |
|               | 50.7 | 10.8             | Schmucke, Germany                     | 2007–2010                    |
|               | 49.6 | 15.1             | Kosetice, Czech Republic              | 2005–2011                    |
|               | 54.4 | 12.7             | Zingst, Germany                       | 2006–2009                    |
|               | 57.4 | 11.9             | Rao, Sweden                           | 2005–2011                    |
|               | 54.9 | 8.3              | Westerland, Germany                   | 2007–2010                    |
|               | 43.4 | -4.9             | Niembro                               | 2004–2006, winter            |
|               | 54.3 | -0.8             | High Muffles                          | 2004–2007                    |
|               | 68.0 | 24.2             | Pallas                                | 2005–2011                    |
|               | 50.2 | 15               | Europe group 1                        | 2007–2011                    |
|               | 48.3 | 17.5             | Europe group 2                        | 2007–2011                    |
|               | 50.2 | 17.5             | Europe group 3                        | 2007–2011                    |
|               | 45.8 | 16.0             | Zagreb, IMI                           | 2007–2011                    |
|               | 47.0 | 19.6             | K-puszta                              | 2009–2011                    |
|               | 56.2 | 21.2             | Rucava, EMEP                          | 2009–2011                    |
|               | 46.5 | 28.3             | Leova                                 | 2007–2011                    |
|               | 52.3 | 4.5              | De Zilk                               | 2009–2011                    |
|               | 54.1 | 22.0             | Diabla Gora                           | 2009–2011                    |
|               | 54.5 | 56.0             | ERPC                                  | 2009–2011                    |
|               | 46.5 | 30.3             | Petrodolinskoe                        | 2009–2011                    |
|               | 42.6 | 23.1             | Europe group 4                        | 2007, Apr.– Aug.             |
|               | 42.0 | 24.8             | Plovdiv, UBMS Dolni Voden             | 2007, Apr.– Aug.             |
|               | 50.2 | 12.5             | Europe group 5                        | 2009, Feb.–June              |
|               | 50.2 | 17.5             | Europe group 6                        | 2010, Feb.–June              |
|               | 50.2 | 15.0             | Europe group 7                        | 2008–2011, Sep.-Mar.         |
| 50.2          | 20.0 | Europe group 8   | 2007, Apr.– Aug.                      |                              |
| 50.1          | 12.4 | Cheb             | 2008, Sep.–Dec.                       |                              |
| 50.5          | 13.4 | Chomutov         | 2008–2011, Sep-Mar                    |                              |
| 49.1          | 13.6 | Churanov, Sumava | 2007–2011, June-Dec                   |                              |
| 48.9          | 14.3 | Klet, Sumava     | 2007–2009, July-Dec                   |                              |
| 50.5          | 13.6 | Most             | 2008–2011, Aug–Feb                    |                              |
| 56.0          | 21.9 | Plateliai        | 2010, June–2011, Jan                  |                              |
| 55.4          | 26.1 | Rugsteliskes     | 2008–2010, Nov–Feb                    |                              |

|        |       |       |                    |                                         |
|--------|-------|-------|--------------------|-----------------------------------------|
|        | 55.1  | 36.6  | Obninsk            | 2009–2010, Sep–Dec                      |
|        | 55.4  | 21.1  | Preila             | 2008–2010, Oct–Mar                      |
|        | 49.0  | 22.3  | Starina            | 2009–2011, July–Mar                     |
|        | 50.6  | 30.5  | Oseshchyna         | 2008, May–2008, Sep                     |
|        | 45.3  | 30.2  | Zmiinyi Island     | 2009–2011, July–Dec                     |
|        | 46.5  | 29.5  | Stefan Voda        | 2007, Apr.– Aug.                        |
|        | 42.4  | 19.3  | Podgorica          | 2007, Apr.– Aug.                        |
|        | 46.5  | 15.7  | Maribor OZADSE     | 2007, Apr.– Aug.                        |
|        | –4.3  | 15.2  | Brazzaville, Congo | 2008–2011                               |
| Africa | 6.7   | –0.8  | Abetefi, Ghana     | 2010–2011                               |
|        | –20.2 | 57.5  | Reduit             | 2008–2011                               |
|        | 8.9   | 7.1   | Sheda              | 2008–2011                               |
|        | 15.6  | 32.5  | Khartoum, Sudan    | 2008–2011                               |
|        | 37.4  | 136.9 | Wajima, Japan      | 2005, May–Sep.<br>2004, Oct.–2005, Apr. |
| Asia   | 37.5  | 121.4 | Yantai, China      | annual                                  |
|        | 40.7  | 45.0  | Asia group 1       | 2008, June–Nov.                         |
|        | 47.1  | 51.9  | Atyrau             | 2008, Apr.–Aug.                         |
|        | 49.8  | 73.1  | Karaganda          | 2008, Apr.–Aug.                         |

Table S2: 208 non-background sites information [*IADN; Hung et al., 2010; Tørseth et al., 2012; Shen et al., 2014; Boruvkova, 2015*]

| region        | lat    | lon                           | Location name                                   | Obs. period                  |                       |
|---------------|--------|-------------------------------|-------------------------------------------------|------------------------------|-----------------------|
| North America | 34.0   | -118.1                        | Long Beach Freeway, Los Angeles Basin           | 2004, May-June<br>2005, Jan. |                       |
|               | 34.1   | -118.2                        | the California State Highway, Los Angeles Basin | 2004, May-June<br>2005, Jan. |                       |
|               | 34.1   | -118.2                        | the California State Highway, Los Angeles Basin | 2006, Feb.-June.             |                       |
|               | 29.8   | -95.4                         | Houston                                         | 1991                         |                       |
|               | 40.5   | -74.4                         | New Brunswick, NJ                               | 1997, Oct.–1998, Oct.        |                       |
|               | 42.4   | -71.1                         | Boston                                          | 1991                         |                       |
|               | 44.3   | -79.9                         | Borden, Ontario, Canada                         | 2001, Oct.–2002, Dec.        |                       |
|               | 41.7   | -87.6                         | Chicago, USA                                    | 2004, Winter                 |                       |
|               | 41.9   | -87.6                         | Chicago, USA                                    | 1995, Summer                 |                       |
|               | 41.9   | -87.6                         | Chicago, America                                | 2004, Summer                 |                       |
|               | 34.2   | -118.2                        | Los Angeles                                     | 2005, Winter                 |                       |
|               | 34.1   | -117.9                        | Los Angeles                                     | 2005, Winter                 |                       |
|               | 34.1   | -118.2                        | Los Angeles, USA                                | 1976, Winter                 |                       |
|               | 27.7   | -82.7                         | Gulfport, FL                                    | 2002, May                    |                       |
|               | 28.0   | -82.2                         | Sydney, Fla                                     | 2002, May                    |                       |
|               | 33.8   | -84.4                         | Jefferson St, GA                                | 2002, May                    |                       |
|               | 30.4   | -89.1                         | Gulfport, MS                                    | 2002, May                    |                       |
|               | 43.8   | -71.8                         | Thompson Farm, NH                               | 2002, May                    |                       |
|               | 41.9   | -87.6                         | Chicago, America                                | 1995, Summer                 |                       |
|               | 34.1   | -118.2                        | Los Angeles, USA                                | 1976, Summer                 |                       |
|               | 39.1   | -76.6                         | Baltimore, America                              | 1997, July                   |                       |
|               | Europe | 38.0                          | 23.7                                            | Athens, Greece               | 2003, Dec.–2004, Feb. |
|               |        | 60.2                          | 25.0                                            | Helsinki, Finland            | 2002, Jan.            |
| 60.2          |        | 25.0                          | Helsinki, Finland                               | 2002, Feb                    |                       |
| 61.9          |        | 25.7                          | Kurkimäki, Finland                              | 2006, winter                 |                       |
| 61.9          |        | 25.7                          | Kurkimäki, in Central Finland                   | 2006, Winter                 |                       |
| 50.1          |        | 14.4                          | Prague 5—Smichov                                | 2004, Jan.                   |                       |
| 50.1          |        | 14.4                          | Prague, Czech Republic                          | 2005, Nov.-Dec.              |                       |
| 43.8          |        | 11.1                          | Bagnoli                                         | 2005, Nov.-Dec.              |                       |
| 51.3          |        | 4.5                           | Point-source                                    | 2002                         |                       |
| 51.2          |        | 4.5                           | Residential                                     | 2002                         |                       |
| 52.5          |        | -1.9                          | Birmingham, UK                                  | 1996, Winter                 |                       |
| 51.0          |        | -3.7                          | Borgerhout, Flanders, Belgium                   | 2001, Nov.-Dec.              |                       |
| 51.0          |        | -3.7                          | Mechelen, Flanders, Belgium                     | 2002, Nov.-Dec.              |                       |
| 51.0          |        | -3.7                          | Zelzate, Flanders, Belgium                      | 2002, Winter                 |                       |
| 51.0          |        | -3.7                          | Petroleumkaai, Flanders, Belgium                | 2003, Winter                 |                       |
| 43.2          |        | 131.9                         | Vladivostok, Russia                             | 1999, Winter                 |                       |
| 51.5          |        | 7.0                           | Essen, Germany                                  | 1981, Winter                 |                       |
| 45.2          |        | 9.2                           | Pavia, Italy                                    | 1996, Feb.-June              |                       |
| 40.6          |        | 22.9                          | Greater Athens Area, Greece                     | 2001, May–2002, June         |                       |
| 44.5          |        | 18.7                          | Tuzla                                           | 2004, May                    |                       |
| 44.5          | 18.7   | Tuzla ' Herzegovina           | 2004, May                                       |                              |                       |
| 43.8          | 18.3   | Sarajevo                      | 2004, May                                       |                              |                       |
| 43.8          | 18.3   | Sarajevo ' Bosnia             | 2004, May                                       |                              |                       |
| 51.0          | -3.7   | Borgerhout, Flanders, Belgium | 2003, Apr.-May                                  |                              |                       |

|      |      |       |                                                 |                       |
|------|------|-------|-------------------------------------------------|-----------------------|
|      | 50.4 | 18.8  | Repty S' la, skie, Poland                       | 1995, May             |
|      | 45.5 | 10.2  | Brcscia, Lombardy, Italy                        | 1991, Mar.-May        |
|      | 45.7 | 7.3   | Aosta, Italy                                    | 1995, Mar.            |
|      | 38.0 | 23.7  | Koropi, Athens, Greece                          | 2003, July-Dec.       |
|      | 38.0 | 23.7  | Spata, Athens, Greece                           | 2003, July-Dec.       |
|      | 38.0 | 23.7  | Athens, Greece                                  | 2003, June-Nov.       |
|      | 38.0 | 23.7  | Athens, Greece                                  | 2004, May-July        |
|      | 60.2 | 25.0  | Helsinki, Finland                               | 2001, Sep.-Oct.       |
|      | 50.1 | 14.4  | Prague, Czech Republic                          | 2000, Summer          |
|      | 43.8 | 11.1  | Bagnoli                                         | 2000, Summer          |
|      | 43.3 | 5.5   | Marseille, France, Penne, sub-urban             | 2004, July            |
|      | 43.3 | 5.4   | Marseille, France, 5 avenues, urban             | 2004, July            |
|      | 52.5 | -1.9  | Birmingham, UK                                  | 1996, Summer          |
|      | 43.2 | 131.9 | Vladivostok, Russia                             | 1999, Summer          |
|      | 51.5 | 7.0   | Essen, Germany                                  | 1981, Summer          |
|      | 51.2 | 3.8   | Flanders, Belgium                               | 2002, Sep.-Nov.       |
|      | 50.1 | 14.4  | Prague, Czech Republic                          | 2004, Sep.            |
|      | 51.2 | 4.4   | Petroleumkaai, Flanders, Belgium                | 2001, Sep.            |
|      | 51.0 | 4.5   | Flanders, Belgium                               | 2002, Sep.-Nov.       |
|      | 40.6 | 22.9  | MAR                                             | 2001, May-2002, June  |
|      | 40.6 | 22.9  | ARI                                             | 2001, May-2002, June  |
|      | 40.6 | 22.9  | ELE                                             | 2001, May-2002, June  |
|      | 40.6 | 23.0  | Thessaloniki, Greece                            | 1996, Jan.-1997, Feb. |
|      | 50.1 | 14.4  | Prague, Czech Republic                          | 2000, Apr.-2001, Mar. |
|      | 57.2 | 14.6  | Ro" rvik                                        | 1994-1999             |
|      | 57.2 | 14.6  | Pallas                                          | 1996-1999             |
|      | 43.8 | 11.1  | Bagnoli                                         | 2000, Dec.-2001, July |
|      | 44.5 | 11.3  | Bologna, Italy                                  | 2003                  |
|      | 43.9 | 11.1  | Prato (Italy)                                   | 2003, Mar.-Nov.       |
|      | 51.5 | -0.2  | London                                          | 1991-1998             |
|      | 51.5 | -0.2  | London                                          | 1992                  |
|      | 43.3 | -1.9  | Errenteria                                      | 1996, Feb.-1997, Dec. |
|      | 43.3 | -1.9  | Errenteria, Basque Country, Spain               | 1996, Jan.-1997, Dec. |
|      | 51.3 | 12.4  | Leipzig, Germany.                               | 1999-2002             |
|      | 53.5 | 10.0  | Wervikstraat, border between Belgium and France | 2003                  |
|      | 41.4 | 2.2   | Barcelona, Spain                                | 2004-2005             |
|      | 53.5 | -2.2  | Manchester                                      | 1991-1998             |
| Asia | 43.1 | 141.4 | Sapporo, Japan                                  | 1997, Winter          |
|      | 43.1 | 141.4 | Sapporo, Japan                                  | 1997, Winter          |
|      | 35.7 | 139.7 | Tokyo, Japan                                    | 1997, Winter          |
|      | 35.7 | 139.7 | Tokyo, Japan                                    | 1997, Winter          |
|      | 36.6 | 136.6 | Kanazawa, Japan                                 | 1999, Winter          |
|      | 36.6 | 136.6 | Kanazawa, Japan                                 | 1999, Winter          |
|      | 37.6 | 127.0 | Seoul, South Korea                              | 2002, Winter          |
|      | 37.6 | 127.0 | Seoul, South Korea                              | 2002, Winter          |
|      | 39.9 | 116.4 | Beijing, China                                  | 2005, Dec.-2006, Jan. |
|      | 22.3 | 114.1 | Hung Hom (PU)                                   | 2000, Nov.-2001, Feb. |
|      | 23.1 | 113.4 | Wushan, Guangzhou, China                        | 2004, Jan.            |
|      | 23.1 | 113.3 | Guangzhou, China                                | 2003, Winter          |
|      | 23.1 | 113.3 | Guangzhou, China                                | 2004, Jan.            |
|      | 11.0 | 106.6 | Ho Chi Minh City ' Vietnam                      | 2005, Jan.-2006, Mar. |
|      | 39.8 | 28.9  | Bursa, Turkey                                   | 2005, Jan.-Feb.       |

|      |       |                          |                       |
|------|-------|--------------------------|-----------------------|
| 35.0 | 138.4 | Shimizu                  | 2001, Winter          |
| 33.9 | 130.8 | Kitakyushu, Japan        | 1997, Winter          |
| 41.9 | 123.4 | Shenyang, China          | 2001, Winter          |
| 3.2  | 101.7 | Kuala Lumpur, Malaysia   | 1998, Sep.–1999, Jan. |
| 26.8 | 80.9  | Lucknow city, India      | 2005, Feb.            |
| 38.9 | 127.1 | Dalian, China            | 2004                  |
| 40.0 | 116.4 | Beijing, China           | 2004                  |
| 23.1 | 113.3 | Guangzhou, China         | 2003                  |
| 23.1 | 113.4 | Wushan, Guangzhou, China | 2004, Apr.            |
| 23.1 | 113.3 | Guangzhou, China         | 2004, Apr.            |
| 22.8 | 108.3 | Yulin, Guangxi, China    | 2004, Mar.–Apr.       |
| 22.8 | 108.3 | Yulin, Guangxi, China    | 2004, Mar.            |
| 34.7 | 135.5 | Osaka, Japan             | 2005, Apr.–2006, May  |
| 31.2 | 121.5 | Shanghai, China          | 2004, Mar.-Apr.       |
| 43.1 | 141.4 | Sapporo, Japan           | 1997, Summer          |
| 43.1 | 141.4 | Sapporo, Japan           | 1997, Summer          |
| 35.7 | 139.7 | Tokyo, Japan             | 1997, Summer          |
| 35.7 | 139.7 | Tokyo, Japan             | 1997, Summer          |
| 36.6 | 136.6 | Kanazawa, Japan          | 1999, Summer          |
| 36.6 | 136.6 | Kanazawa, Japan          | 1999, Summer          |
| 39.1 | 117.3 | Tianjin                  | 2005, July-Aug.       |
| 39.1 | 117.3 | Tianjin                  | 2005, July-Aug.       |
| 39.1 | 117.3 | Tianjin                  | 2005, July-Aug.       |
| 22.3 | 114.1 | Kwun Tong (KT)           | 2001, June-Aug.       |
| 22.3 | 114.2 | Hung Hom (PU)            | 2001, June-Aug.       |
| 23.1 | 113.4 | Wushan, Guangzhou, China | 2003, Aug.            |
| 23.1 | 113.3 | Guangzhou, China         | 2003, Summer          |
| 23.1 | 113.3 | Guangzhou, China         | 2002, Summer          |
| 39.8 | 28.9  | Bursa, Turkey            | 2004, July-Aug.       |
| 34.7 | 135.5 | Osaka, Japan             | 2005, Apr.–2006, May  |
| 33.9 | 130.8 | Kitakyushu, Japan        | 1997, Summer          |
| 41.9 | 123.4 | Shenyang, China          | 2001, Summer          |
| 23.7 | 121.0 | Taiwan, suburban         | Annual                |
| 23.1 | 113.3 | Guangzhou, China         | 2002, Sep.-Nov.       |
| 23.1 | 113.3 | Guangzhou, China         | 2003, Nov.            |
| 23.1 | 113.4 | Wushan, Guangzhou, China | 2003, Nov.            |
| 35.2 | 138.7 | Shizuoka, Japan          | 2001, Feb.–2002, Jan. |
| 35.0 | 138.4 | Shizuoka, Japan          | 2001, Feb.–2002, Jan. |
| 38.9 | 121.5 | Dalian, China            | Annual                |
| 37.6 | 127.0 | Seoul, Korea             | 1993, Mar.-Dec.       |
| 37.6 | 127.0 | Seoul, Korea             | 1998, Oct.–1999, Dec  |
| 32.1 | 118.8 | Nanjing, China           | 2001–2002             |
| 32.1 | 118.8 | Nanjing urban, China     | 2001–2002             |
| 24.5 | 118.1 | Xiamen                   | 2005                  |
| 24.5 | 118.1 | Xiamen                   | 2005                  |
| 24.9 | 118.0 | Xiamen                   | 2005                  |
| 37.6 | 116.7 | Dezhou, China            | Annual                |
| 37.4 | 116.3 | Dezhou, China            | Annual                |
| 23.1 | 113.3 | Guangzhou, China         | 2001, Apr.–2002, Mar. |
| 40.0 | 116.3 | Beijing, China           | Annual                |
| 22.4 | 114.1 | Hong Kong                | Annual                |
| 22.3 | 114.1 | Kwun Tong (KT)           | 2000, Nov.–2001, Mar. |
| 37.9 | 112.1 | Taiyuan, China           | Annual                |

|               |       |       |                                                              |                                    |
|---------------|-------|-------|--------------------------------------------------------------|------------------------------------|
|               | 37.9  | 112.5 | Taiyuan, China                                               | Annual                             |
|               | 10.8  | 106.7 | VNU, Vietnam National University                             | 2005, Jan.–2006, Mar.              |
|               | 10.8  | 106.7 | DOSTE                                                        | 2005, Jan.–2006, Mar.              |
|               | 10.8  | 106.7 | ITTE                                                         | 2005, Jan.–2006, Mar.              |
|               | 38.9  | 106.1 | Yinchuan, China                                              | Annual                             |
|               | 38.9  | 106.1 | Yinchuan, China                                              | Annual                             |
|               | 38.1  | 102.7 | Wuyi, China                                                  | Annual                             |
|               | 37.9  | 102.6 | Wuyi, China                                                  | Annual                             |
|               | 23.5  | 88.4  | Kolkata (Calcutta), India                                    | 2003, Nov.–2004, Nov.              |
|               | 23.5  | 88.4  | Kolkata (Calcutta), India                                    | 2003, Nov.–2004, Nov.              |
|               | 28.6  | 77.2  | New Delhi, India                                             | 2003                               |
|               | 28.6  | 77.2  | New Delhi, India                                             | 2002                               |
|               | 28.6  | 77.2  | New Delhi, India                                             | 2001, Apr.–2002, Mar.              |
|               | 31.5  | 74.3  | Lahore, Pakistan                                             | 1992, Sep.–1993, Oct.              |
|               | 31.5  | 74.3  | Lahore, Pakistan                                             | 1992, Sep.–1993, Oct.              |
|               | 31.5  | 74.3  | Lahore, Pakistan                                             | 1992, Sep.–1993, Oct.              |
|               | 40.2  | 29.0  | Merinos, Turkey                                              | 2004, Aug.–2005, Apr.              |
|               | 40.2  | 29.1  | Merinos, Turkey                                              | 2004, Aug.–2005, May               |
|               | 39.8  | 28.9  | Bursa, Turkey                                                | 2004, Aug.–2005, Apr.              |
|               | 34.4  | 132.8 | Higashi Hiroshima, Japan                                     | 2006, Jan.–2007, Jan.              |
|               | 32.8  | 129.9 | Nagasaki city, Japan                                         | 1997, July–1998, June              |
|               | 35.2  | 128.6 | Changwon-Masan, Korea                                        | 2004, Oct.-Nov.                    |
|               | 35.9  | 127.8 | Korea                                                        | 2002                               |
|               | 37.4  | 121.5 | Yantai, China                                                | Annual                             |
|               | 23.7  | 120.6 | Tunghai university, Taiwan                                   | 2001, Aug.–2002, Apr.              |
|               | -6.3  | 106.9 | Jakarta, Indonesia                                           | 1992, Dec.–1993, Dec.              |
|               | 1.3   | 103.8 | Singapore                                                    | 1994                               |
|               | 3.0   | 101.7 | university of Malaya                                         | 2001, Mar.–Dec.                    |
|               | 15.9  | 101.0 | Thailand                                                     | 2000                               |
|               | 13.8  | 100.5 | Bangkok, Thailand                                            | 1993, Apr.–Oct.<br>1994, Feb.-Apr. |
|               | 19.0  | 72.9  | The creek adjoining Mumbai harbour, India                    | 2000, June–2001, May               |
|               | 40.4  | 116.9 | Miyun                                                        | 2004, Mar.-May                     |
| Africa        | 36.7  | 3.1   | Oued Smar, Algeria                                           | 2002, Aug.–Sep.,                   |
|               | 36.7  | 3.1   | Oued Smar, Algeria                                           | 2002, Nov.–2003, Feb.              |
| Oceanic       | -37.8 | 145.0 | Melbourne, Australia                                         | 1993                               |
|               | -27.7 | 153.0 | Brisbane, Australia                                          | 2002, Winter                       |
|               | -27.7 | 153.0 | Brisbane, Australia                                          | 1998, Winter                       |
|               | -27.7 | 153.0 | Brisbane, Australia                                          | 1998, Summer                       |
|               | -27.5 | 153.0 | Brisbane, Australia                                          | 2004, Summer                       |
| South America | -34.9 | -58.0 | La Plata, Argentina                                          | 2000–2002                          |
|               | -34.9 | -58.0 | La Plata, Argentina                                          | 1999–2002                          |
|               | -34.9 | -58.0 | La Plata, Argentina                                          | 2000–2002                          |
|               | -34.9 | -58.0 | La Plata, Argentina                                          | 2000–2002                          |
|               | -30.0 | -51.2 | Metropolitan Area of Porto Alegre (MAPA), Brazil             | 2002–2005                          |
|               | -31.7 | -54.1 | Candiota region, Brazil                                      | 2001, Feb.-Oct.                    |
|               | -30.0 | -51.2 | Metropolitan Area of Porto Alegre, Rio Grande do Sul, Brazil | 2001, Oct.–2002, Dec.              |
|               | -30.0 | -51.6 | Charqueadas                                                  | 2001, Oct.–2002, Dec.,<br>Winter   |
|               | -30.0 | -51.2 | CEASA                                                        | 2001, Oct.–2002, Dec.,<br>Winter   |

---

|       |       |                           |                 |
|-------|-------|---------------------------|-----------------|
| -30.0 | -51.2 | Porto Alegre, Brazil      | 2002, Mar.-May  |
| -22.8 | -43.2 | Rio de Janeiro, Brazil    | 1998, Nov.      |
| -23.7 | -46.6 | Sao Paulo City, Brazil    | 2000, Aug.-Dec. |
| -23.6 | -46.6 | Sao Paulo City, Brazil    | 2002, May-July  |
| -20.5 | -54.7 | Indubrasil                | 2003, July-Dec. |
| -20.4 | -54.6 | Campo Grande City, Brazil | 1998, July-Nov. |
| -20.4 | -54.6 | Campo Grande, Brazil      | 2003, July-Dec. |
| -20.4 | -54.6 | Campo Grande, Brazil      | 2003, July-Dec. |

---



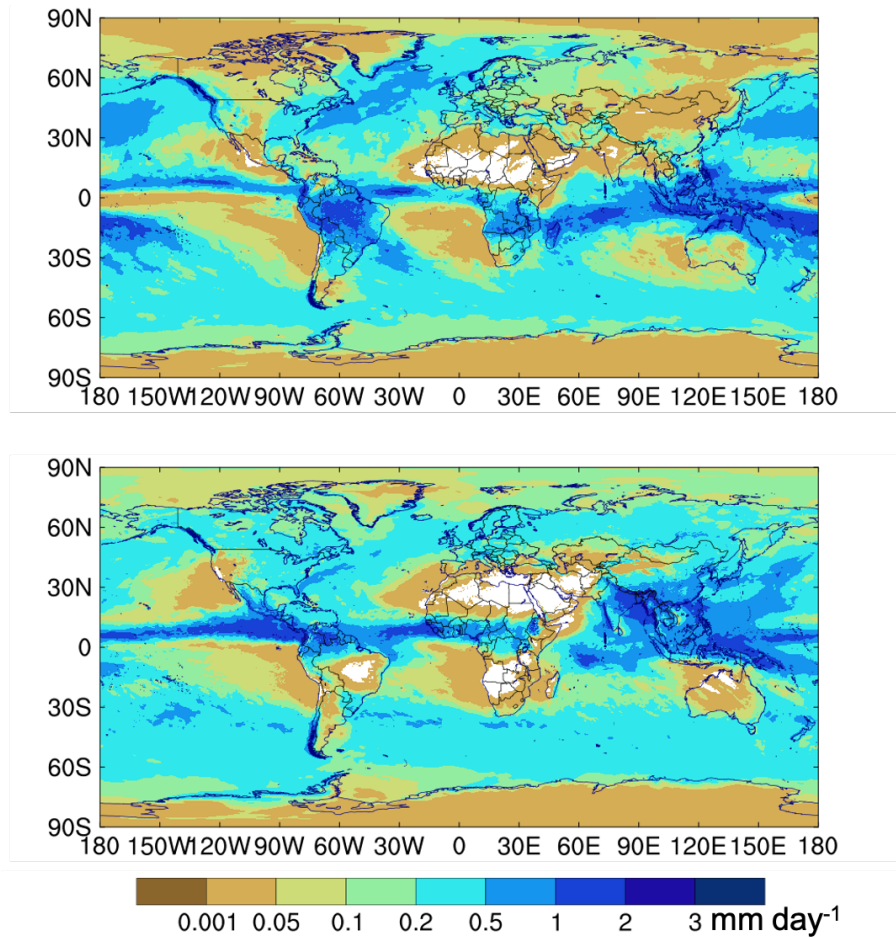

Figure S1. The spatial distribution of surface-layer average precipitation (unit: mm day<sup>-1</sup>) in DJF (December-January-February) and JJA (June-July-August), respectively.

## References

- Boruvkova, J. (2015), GENASIS-Global Environmental Assessment and Information System, version 2.0., Masaryk University, [www.genasis.cz](http://www.genasis.cz).
- Hung, H., Kallenborn, R., Breivik, K., Su, Y., Brorström-Lundén, Olafsdottir, K., Thorlacius, J. M., Leppänen, S., Bossi, R., Skov, H., Manø, S., Patton, G. W., Stern, G., Sverko, E., Fellin, P.: Atmospheric monitoring of organic pollutants in the Arctic under the Arctic Monitoring and Assessment Programme (AMAP): 1993-2006, *Sci. Total Environ.*, 408(15), 2854-2873, doi:10.1016/j.scitotenv.2009.10.004.
- IADN: The Integrated Atmospheric Deposition Network (IADN), <https://www.ec.gc.ca/rs-mn/default.asp?lang=En&n=BFE9D3A3-1>.
- Shen, H., Tao, S., Liu, J., Huang, Y., Chen, H., Li, W., Zhang, Y., Chen, Y., Su, S., Lin, N., Xu, Y., Li, B., Wang, X., and Liu, W.: Global lung cancer risk from PAH exposure highly depends on emission sources and individual susceptibility, *Sci. Rep.*, 4, 6561, <https://doi.org/10.1038/srep06561>, 2014.
- Tørseth, K., Aas, W., Breivik, K., Fjærraa, A. M., Fiebig, M., Hjellbrekke, A.-G., Lund Myhre, C., Solberg, S., and Yttri, K. E.: Introduction to the European Monitoring and Evaluation Programme (EMEP) and observed atmospheric composition change during 1972–2009, *Atmos. Chem. Phys.*, 12(12), 5447-5481, doi:10.5194/acp-12-5447-2012, 2012.
